# Supplementary material for: ETS family transcriptional regulators drive chromatin dynamics and malignancy in squamous cell carcinomas
Source: eLife journal article supplement (doi:10.7554/elife.10870), 2015-11-21
Supplement: supp [file elife-10870-supp-v1.zip]

**A**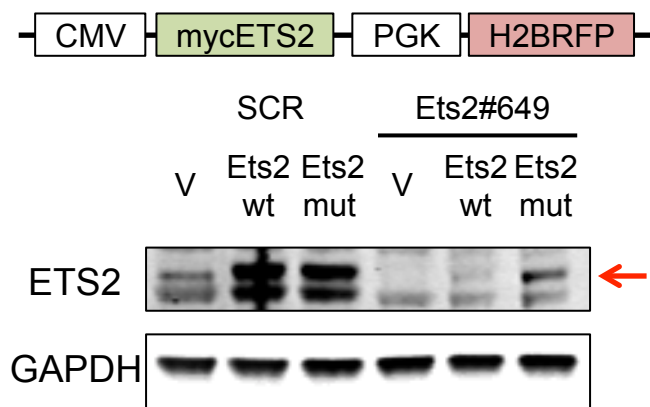**B**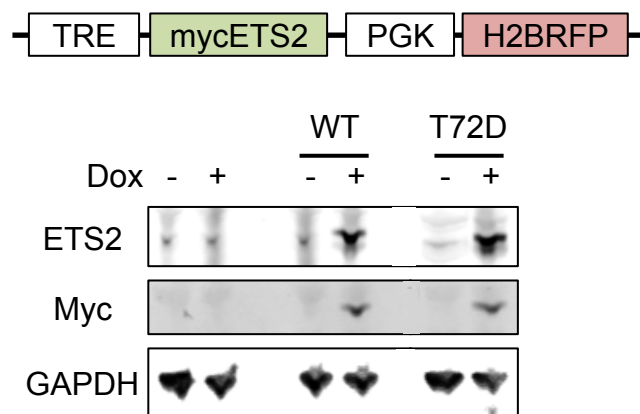**C**K14-rtTA- (CTRL)  
TRE-ETS2(WT)K14-rtTA+  
TRE-ETS2(WT)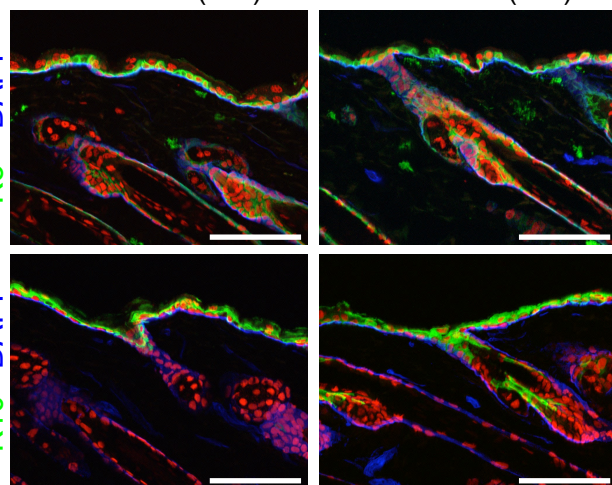**D**K14-rtTA- (CTRL)  
TRE-ETS2(T72D)K14-rtTA+ (OE)  
TRE-ETS2(T72D)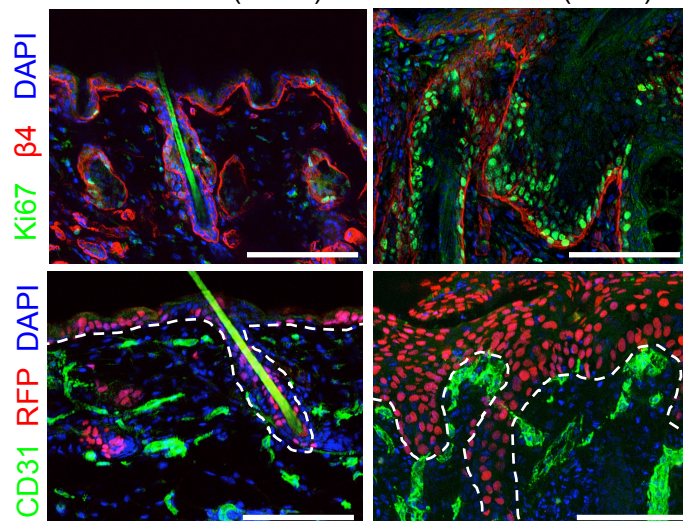**E**K14-rtTA- (CTRL)  
TRE-ETS2(T72D)K14-rtTA+ (OE)  
TRE-ETS2(T72D)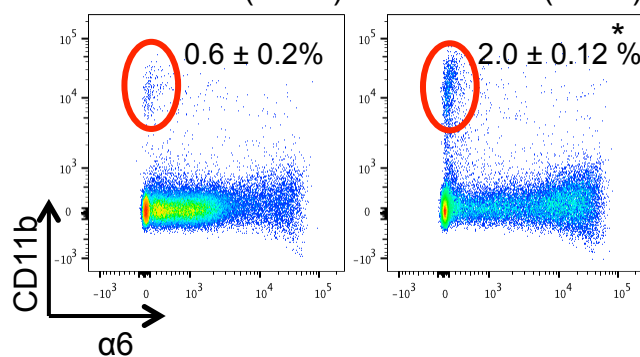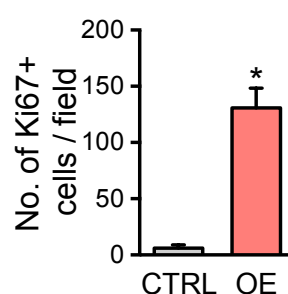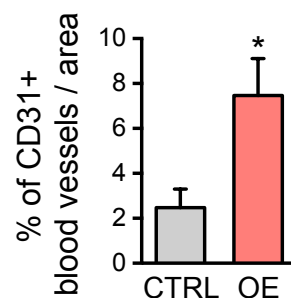

**Figure 5-figure supplement 1**
