# Supplementary figures and images for: ETS family transcriptional regulators drive chromatin dynamics and malignancy in squamous cell carcinomas
Source: eLife journal article supplement (doi:10.7554/elife.10870), 2015-11-21

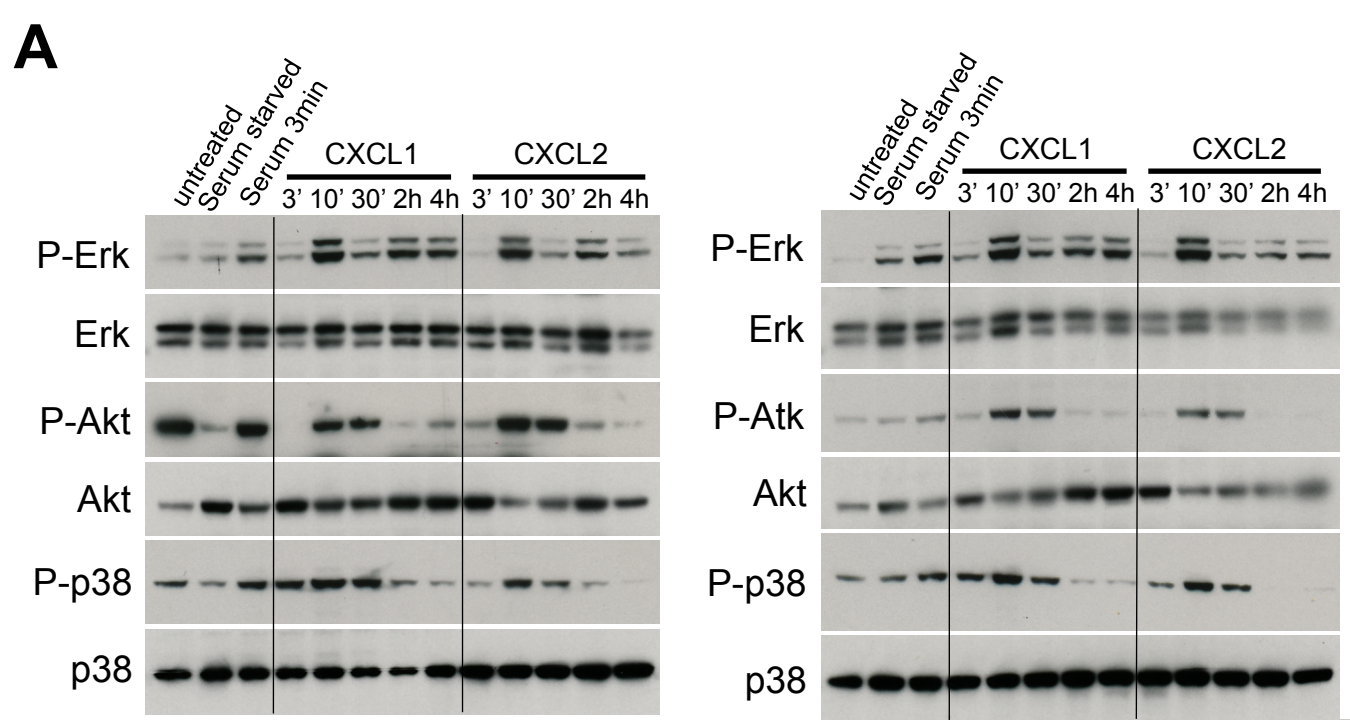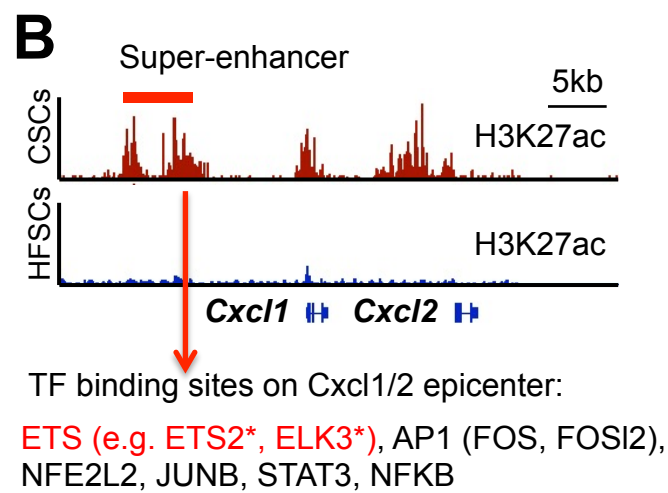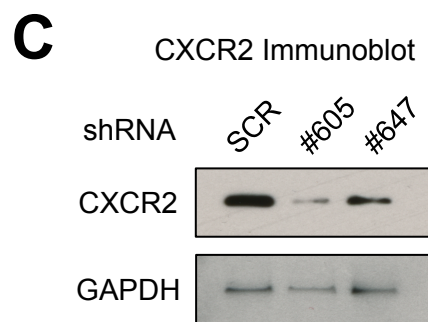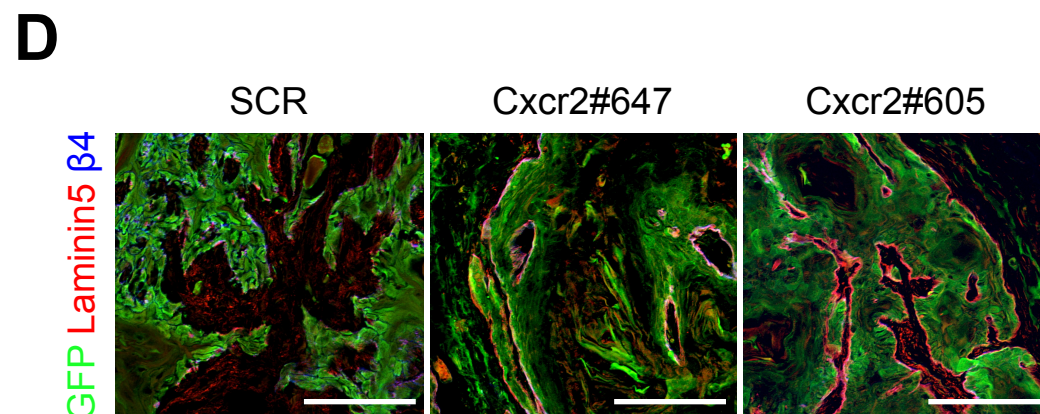

**Figure 7-figure supplement 1**

Supplement: supp [file elife-10870-supp-v1.zip]

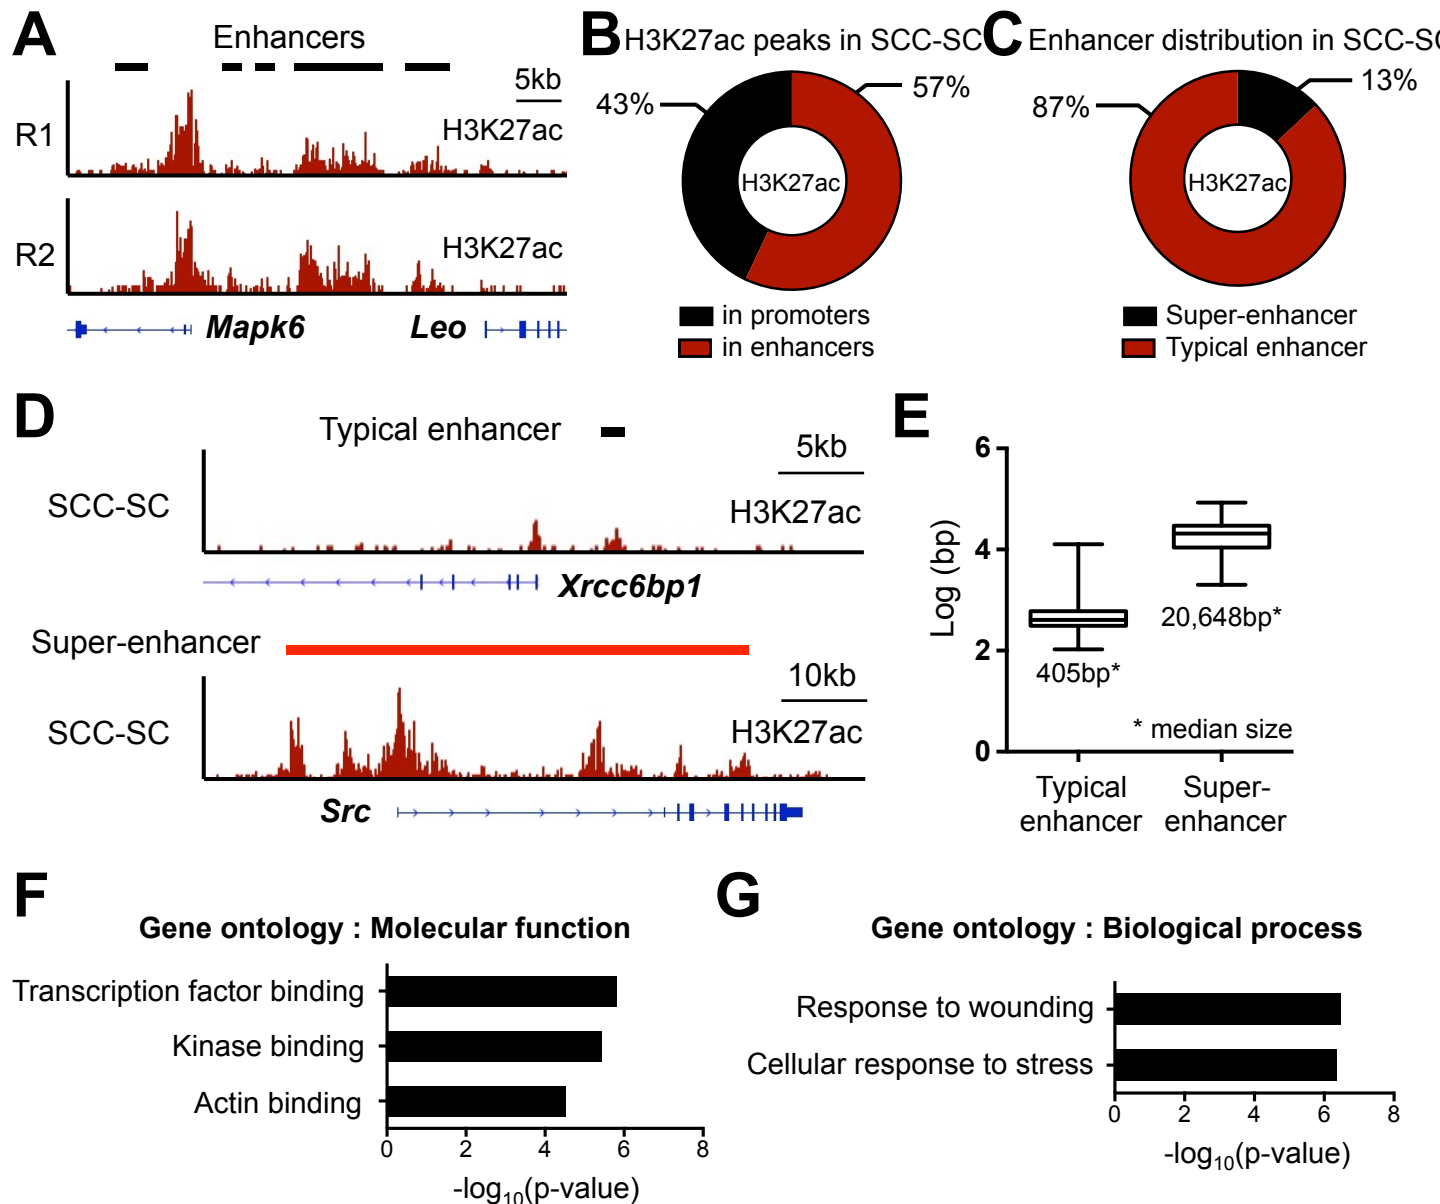

Figure 1-figure supplement 2

Supplement: supp [file elife-10870-supp-v1.zip]

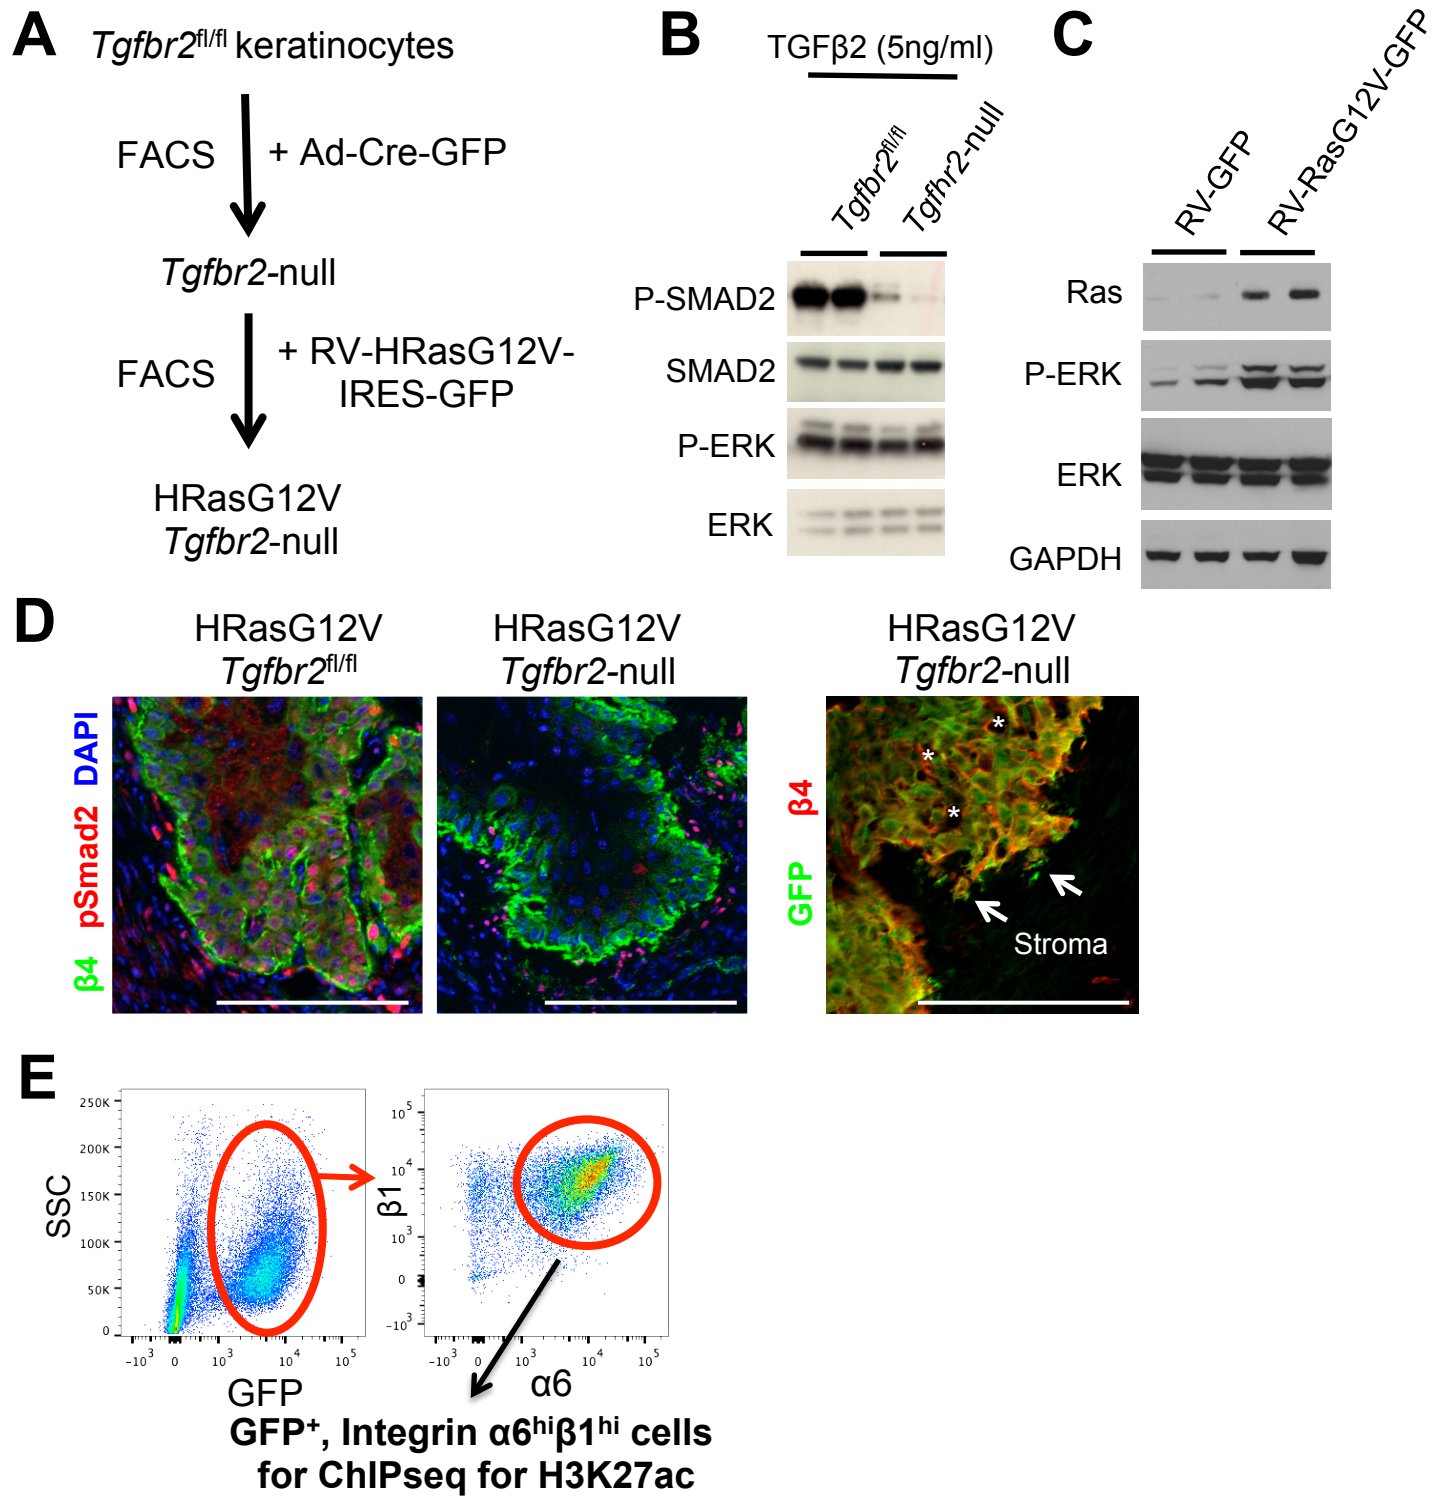

**Figure 1-figure supplement 1**

Supplement: supp [file elife-10870-supp-v1.zip]
